# Supplementary material for: A Bayesian approach to historical climatology for the Burgundian Low Countries in the 15th century
Source: Copernicus journal article supplement (doi:10.5194/cp-18-2449-2022), 2022-11-09
Supplement: Supplementary file 1 [file cp-18-2449-2022-supplement.pdf]

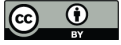

*Supplement of*

## **A Bayesian approach to historical climatology for the Burgundian Low Countries in the 15th century**

**Chantal Camenisch et al.**

*Correspondence to:* Chantal Camenisch ([chantal.camenisch@hist.unibe.ch](mailto:chantal.camenisch@hist.unibe.ch)) and Sam White ([white.2426@osu.edu](mailto:white.2426@osu.edu))

The copyright of individual parts of the supplement might differ from the article licence.

## 1. SUPPLEMENTAL FIGURES

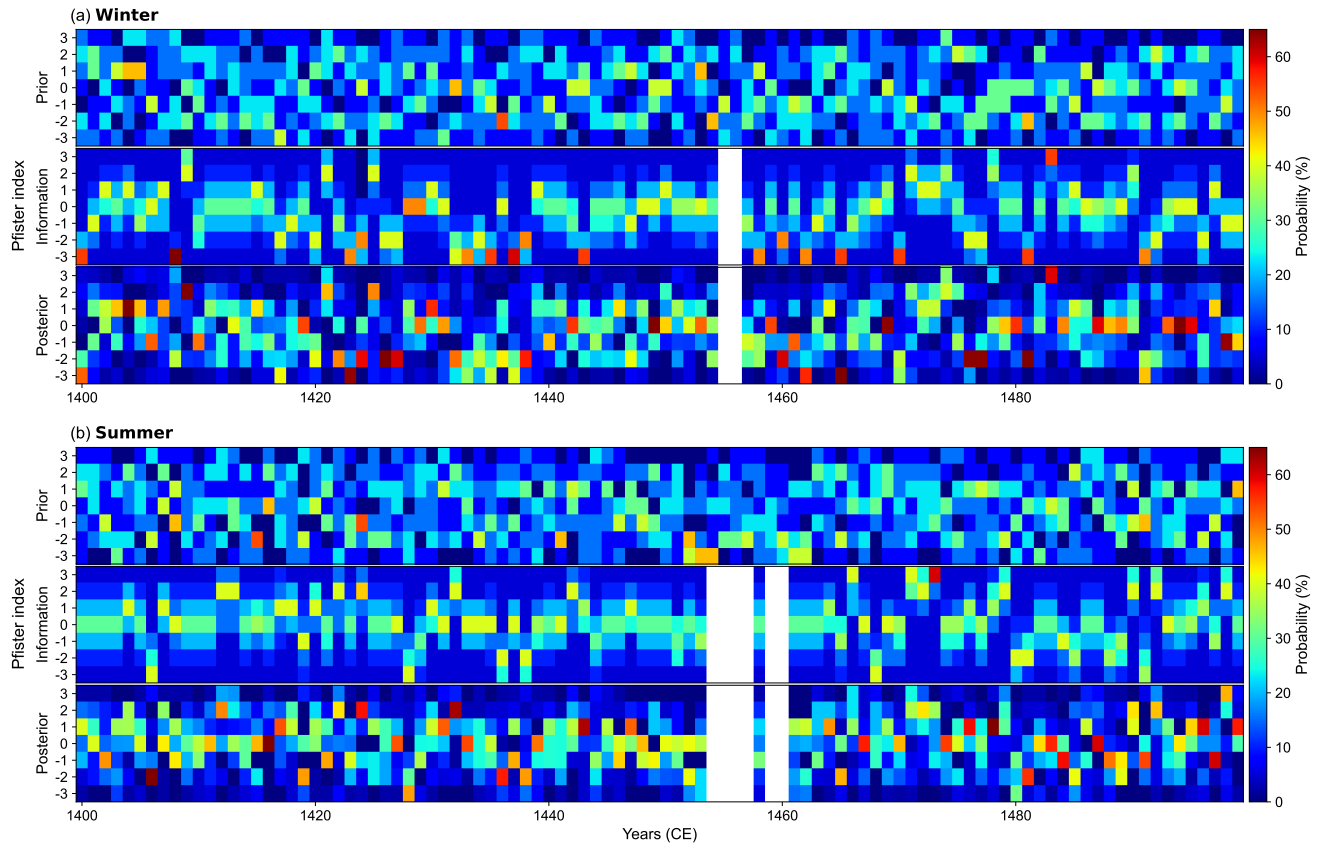

**Fig. S1.** Prior, historical information, and posterior probability distributions of seasonal temperatures in the Burgundian Low Countries for (a) winters and (b) summers ranging from 1400 CE to 1499 CE. Top panels represent the prior probability distribution,  $p(\text{Climate})$ , extracted from 2-meter air temperatures of the 13-member CESM-LME and converted into Pfister indices. Middle panels illustrate the probability distribution of the information,  $p(\text{Observations} \mid \text{Climate})/p(\text{Observations})$ , acquired from historical archives compiled and converted into Pfister indices by historians. Bottom panels depict the posterior probability distribution,  $p(\text{Climate} \mid \text{Observation})$ . White spaces are shown when there are no observations available and therefore the posterior matches the prior.
